# Supplementary material
Source: publisher figshare collection journal article supplement (https://springernature.figshare.com/ndownloader/files/14604755)
Supplement: Supplementary file [file 14604755]

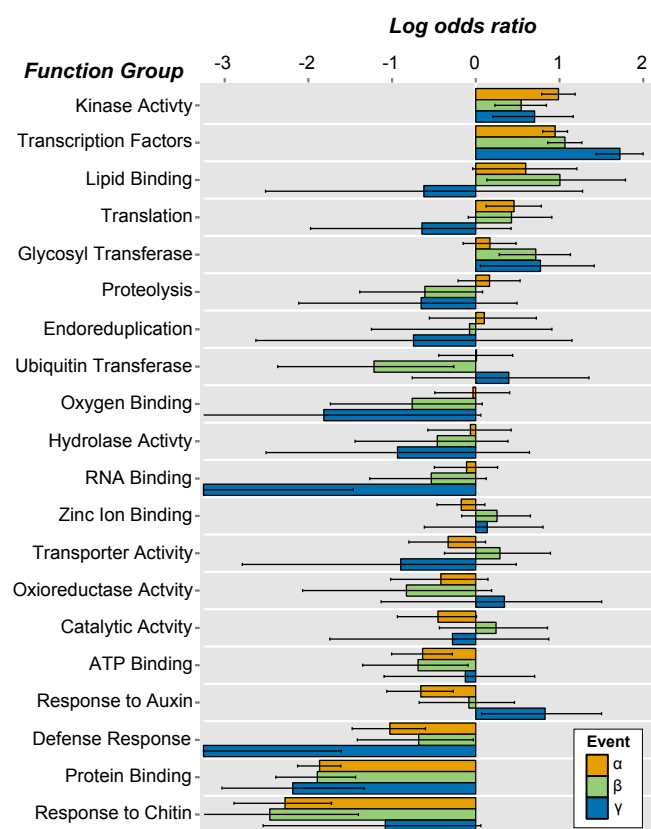

**Figure S1** Retention of WGD-duplicate genes in *A. thaliana*. The duplicate gene retention rates (log odds ratios) within 20 function groups relative to whole genome. Groups are ordered by the odds in the alpha event. Colors represent different WGD duplication events ( $\alpha$  = orange,  $\beta$  = green,  $\gamma$  = blue). Bars indicate the 95% confidence interval of the odds of retention. If the confidence interval does not overlap with zero, this indicates the odd of retaining a duplicate gene is significantly different than the genome average from that functional group at the 5% level.
